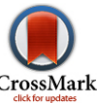

## Correction

# Correction: Intersegmental Eye-Head-Body Interactions during Complex Whole Body Movements

The *PLOS ONE* Staff

## Notice of Republication

This article was republished on August 8, 2014, to correct errors in the author byline, citation, and references that were introduced during the production process. Please download this article again to view the correct version. The originally published, uncorrected article and the republished, corrected article are provided here for reference.

## Supporting Information

**File S1.** Originally published, uncorrected article.  
(PDF)

**File S2.** Republished corrected article.  
(PDF)

## Reference

1. von Laßberg C, Beykirch KA, Mohler BJ, Bühlhoff HH (2014) Intersegmental Eye-Head-Body Interactions during Complex Whole Body Movements. *PLoS ONE* 9(4): e95450. doi:10.1371/journal.pone.0095450

**Citation:** The *PLOS ONE* Staff (2014) Correction: Intersegmental Eye-Head-Body Interactions during Complex Whole Body Movements. *PLoS ONE* 9(10): e112206. doi:10.1371/journal.pone.0112206

**Published:** October 24, 2014

**Copyright:** © 2014 The *PLOS ONE* Staff. This is an open-access article distributed under the terms of the Creative Commons Attribution License, which permits unrestricted use, distribution, and reproduction in any medium, provided the original author and source are credited.
